# Supplementary material for: The unexpected depths of genome‐skimming data: A case study examining Goodeniaceae floral symmetry genes1
Source: Atypon-hosted journal article supplement (doi:10.3732/apps.1700042), 2017-10-01
Supplement: apps.1700042_s1.xlsx [file apps.1700042_s1.xlsx]

## Sheet: Sheet1
Berger et al.—Applications in Plant Sciences 2017 5(10): 1700042—Data Supplement S1
Appendix S1. SOAPdenovo-Trans assembly info for all taxa. K-mer - 25
Taxon	Accession	No. of reads	Size including N's	Size w/out N's	No. of scaffolds	Longest scaffold	N50	Mean size	No. of contigs in scaffolds	Scaffolds >100 bp	Scaffolds >500 bp	Scaffolds >1000 bp	Scaffolds >10 Kbp	Scaffolds >100 Kbp
Brunonia australis	821	20298026	24779056	24669620	164715	43894	134	150	159656	121,663 (73.86%)	2699 (1.64%)	814 (0.49%)	16 (0.01%)
Coopernookia polgalacea	830	15686920	62209164	62091744	354963	51989	179	175	344334	296,121 (83.42%)	7687 (2.17%)	1126 (0.32%)	14 (0.00%)
Coopernookia strophiolata	843	18376278	82937705	82778223	454445	33361	191	182	439114	391,825 (86.22%)	11,970 (2.63%)	1374 (0.30%)	23 (0.01%)
Diaspasis filifolia	829	17147606	62962866	62807650	331448	85261	199	189	316067	282,552 (85.25%)	11,116 (3.35%)	2104 (0.63%)	14 (0.00%)
Goodenia decursiva	837	22847200	158074932	157801760	621984	81414	322	254	574138	583,601 (93.83%)	61,751 (9.93%)	9345 (1.50%)	17 (0.00%)
Goodenia drummondii	825	20031232	104297773	104128783	481648	79580	251	216	458310	432,092 (89.71%)	26,579 (5.52%)	2921 (0.61%)	14 (0.00%)
Goodenia filiformis	838	19923330	129445933	129236171	524429	69269	308	246	488477	491,262 (93.68%)	47,645 (9.09%)	6859 (1.31%)	9 (0.00%)
Goodenia hassalli	826	19548116	138183135	137895862	598571	56490	279	230	558189	548,726 (91.67%)	43,904 (7.33%)	5589 (0.93%)	14 (0.00%)
Goodenia helmsii	820	19313898	108340634	108146554	496274	38320	253	218	472631	445,236 (89.72%)	28,746 (5.79%)	3177 (0.64%)	21 (0.00%)
Goodenia micrantha	819	16788718	95956453	95803648	419442	33424	276	228	399467	373,386 (89.02%)	29,306 (6.99%)	3464 (0.83%)	13 (0.00%)
Goodenia ovata	839	20482178	88135328	87921623	438368	23907	221	201	417086	381,961 (87.13%)	18,611 (4.25%)	2897 (0.66%)	21 (0.00%)
Goodenia phillipsiae	836	24145646	91908058	91693762	496940	76364	193	184	476771	437,432 (88.03%)	14,181 (2.85%)	1835 (0.37%)	15 (0.00%)
Goodenia pinifolia	841	20806614	120044690	119808674	565654	123122	242	212	536997	510,827 (90.31%)	29,456 (5.21%)	2968 (0.52%)	13 (0.00%)	1 (0.00%)
Goodenia tripartita	833	18400166	56694907	56532945	321528	27950	178	176	309543	261,945 (81.47%)	8025 (2.50%)	1596 (0.50%)	13 (0.00%)
Goodenia viscida	845	17499710	79184425	79024999	420644	60108	200	188	405287	363,749 (86.47%)	12,491 (2.97%)	1781 (0.42%)	15 (0.00%)
Scaevola collaris	842	20480206	89668668	89492446	512822	80627	177	174	497857	442,136 (86.22%)	10,774 (2.10%)	1749 (0.34%)	6 (0.00%)
Scaevola phlebopetala	828	22302836	112775898	112568224	580874	98263	210	194	555197	522,039 (89.87%)	20,199 (3.48%)	1870 (0.32%)	12 (0.00%)
Scaevola porocarya	827	14830644	77135720	76971687	403886	33037	204	190	386879	347,554 (86.05%)	13,250 (3.28%)	1879 (0.47%)	9 (0.00%)
Scaevola tomentosa	832	19294312	78147486	78023701	454435	39564	175	171	441943	389,316 (85.67%)	7861 (1.73%)	926 (0.20%)	14 (0.00%)
Selliera radicans	844	20691984	109029630	108793743	509802	32915	245	213	485968	465,603 (91.33%)	27,619 (5.42%)	3140 (0.62%)	28 (0.01%)
Velleia discophora	822	16425972	107220747	107010297	491784	26481	255	218	467220	440,217 (89.51%)	28,805 (5.86%)	3323 (0.68%)	11 (0.00%)
Velleia foliosa	835	19506716	125944372	125667076	507350	84549	310	248	475005	465,787 (91.81%)	45,754 (9.02%)	6680 (1.32%)	16 (0.00%)
Velleia rosea	818	16823610	55311853	55189374	314212	35101	177	176	302899	262,607 (83.58%)	7161 (2.28%)	1283 (0.41%)	29 (0.01%)
Verreauxia reinwardtii	823	21007648	137396305	137139677	573676	68525	294	239	538891	529,570 (92.31%)	47,230 (8.23%)	5967 (1.04%)	17 (0.00%)
